# Supplementary material for: Metal–organic framework-derived nickel phosphides as efficient electrocatalysts toward sustainable hydrogen generation from water splitting
Source: Royal Society of Chemistry journal article supplement (doi:10.1039/c4ra15680c), 2015-01-01
Supplement: c4ra15680c1.pdf [file c4ra15680c1.pdf]

**Electronic Supplementary Information (ESI) for**  
**Metal-organic framework-derived nickel phosphides as**  
**efficient electrocatalysts toward sustainable hydrogen**  
**generation of water splitting**

Tian Tian, Lunhong Ai,\* and Jing Jiang,\*

Chemical Synthesis and Pollution Control Key Laboratory of Sichuan Province, College of Chemistry and Chemical Engineering, China West Normal University, Shida Road 1, Nanchong 637002, P.R. China.

E-mail: ah\_aihong@163.com (L. Ai); 0826zjjh@163.com (J. Jiang); Tel/Fax: +86-817-2568081

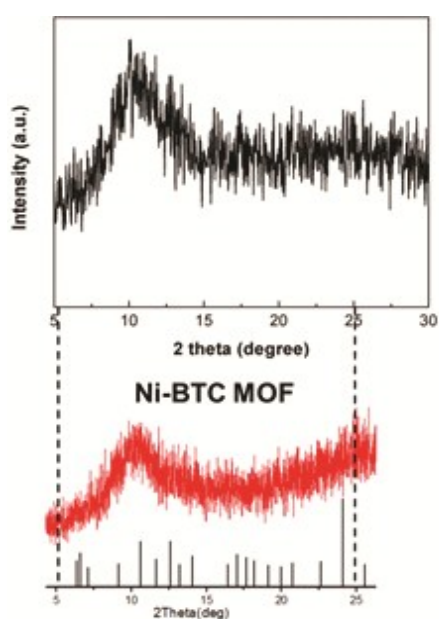

*Chem. Commun.*, 2014, **50**, 9485-9488

**Fig. S1** XRD pattern of Ni-BTC MOF.

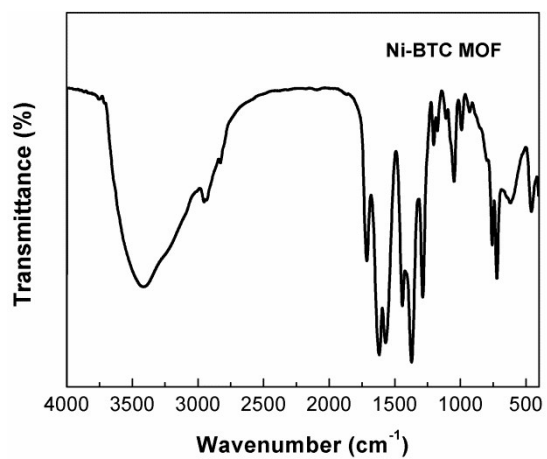

Fig. S2 FTIR spectra of Ni-BTC MOF

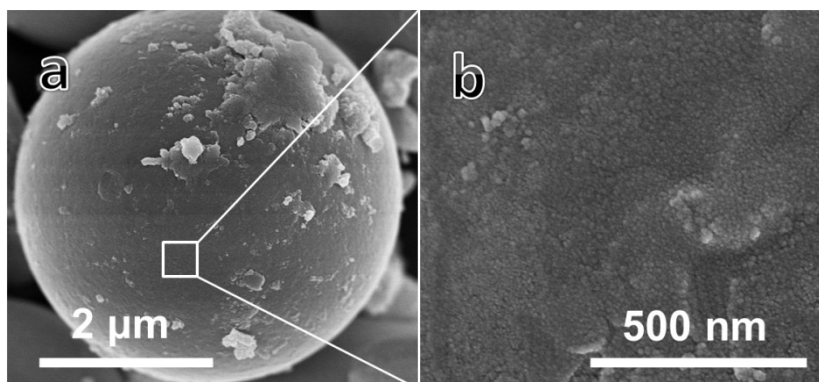

Fig. S3 SEM images of Ni-BTC MOF

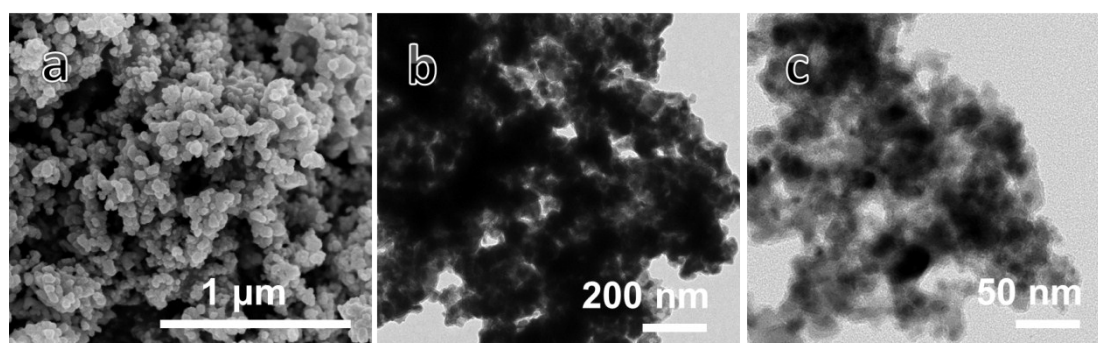

Fig. S4 SEM (a) and TEM images (b,c) of Ni<sub>2</sub>P nanoparticles

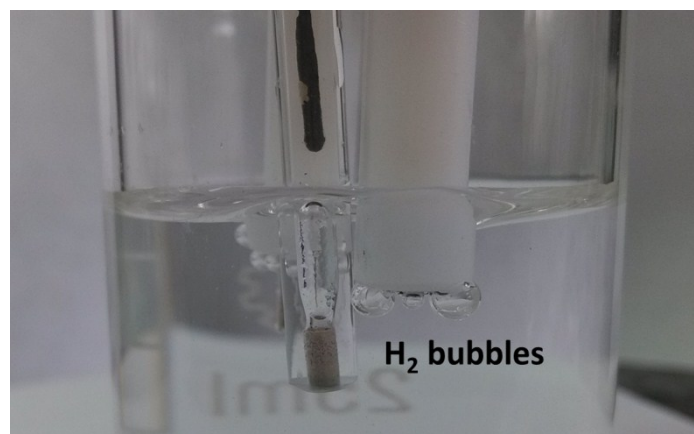

**Fig. S5** Optical image of the generated  $H_2$  bubbles on  $Ni_2P$  nanoparticles modified GCE

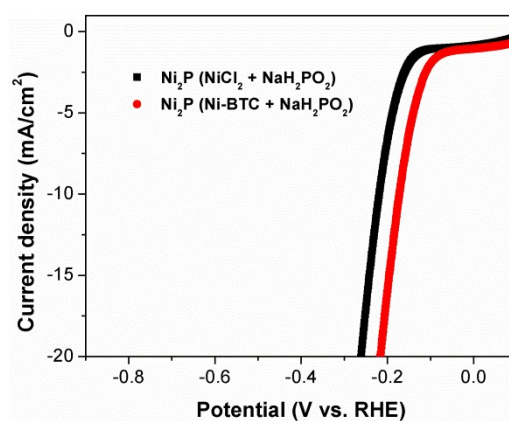

**Fig. S6** Polarization curves of the  $Ni_2P$  synthesized from different Ni-based precursor with a scan rate of  $5 \text{ mV s}^{-1}$  in  $0.5 \text{ M H}_2\text{SO}_4$  solution

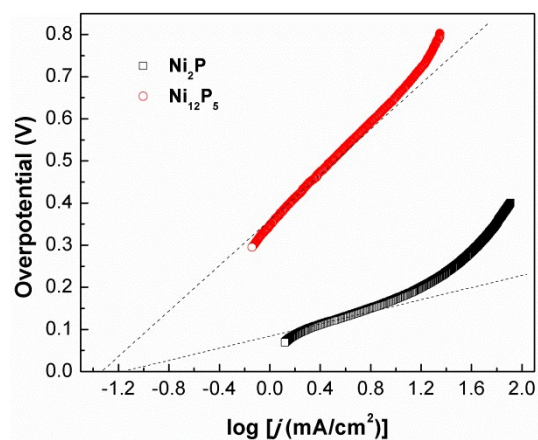

**Fig. S7** Calculated exchange current densities of the  $Ni_2P$  and  $Ni_{12}P_5$  nanoparticles by applying extrapolation method to the Tafel plots

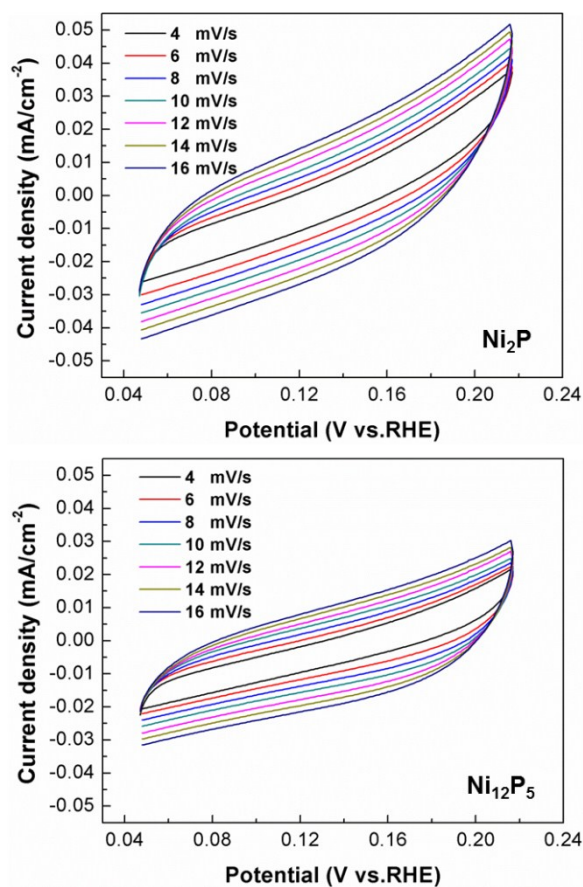

**Fig. S8** Cyclic voltammograms (CVs) of  $\text{Ni}_2\text{P}$  and  $\text{Ni}_{12}\text{P}_5$  nanoparticles measured at different scan rates from 4 to 16  $\text{mV s}^{-1}$ .

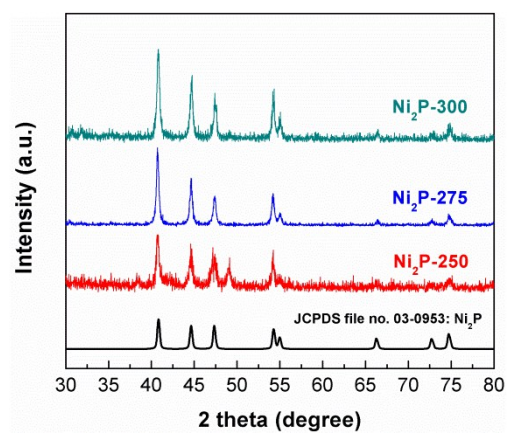

**Fig. S9** XRD patterns of  $\text{Ni}_2\text{P}$ -250,  $\text{Ni}_2\text{P}$ -275, and  $\text{Ni}_2\text{P}$ -300

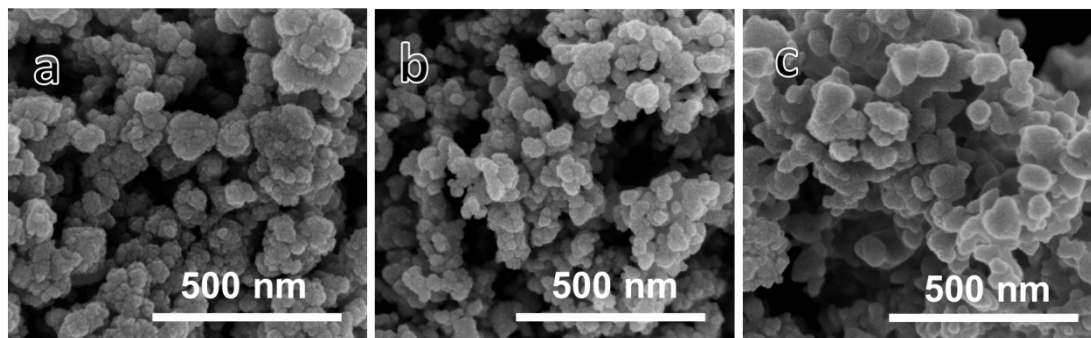

**Fig. S10** SEM images of Ni<sub>2</sub>P-250 (a), Ni<sub>2</sub>P-275 (b), Ni<sub>2</sub>P-300 (c)

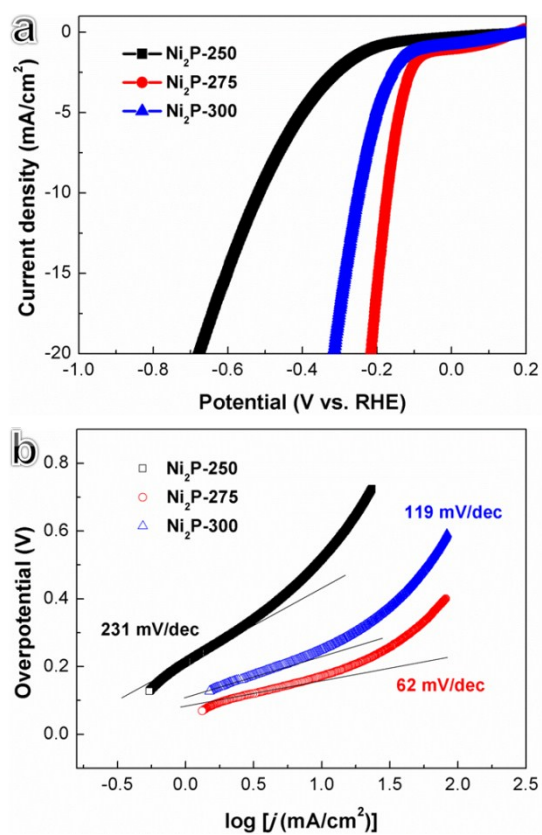

**Fig. S11** Polarization curves of the Ni<sub>2</sub>P-250, Ni<sub>2</sub>P-275, and Ni<sub>2</sub>P-300 with a scan rate of 5 mV s<sup>-1</sup> in 0.5 M H<sub>2</sub>SO<sub>4</sub>. (b) Tafel plots of the Ni<sub>2</sub>P-250, Ni<sub>2</sub>P-275, and Ni<sub>2</sub>P-300.
